# Supplementary material
Source: PubMed Central journal article supplement (PMC4133145)
Supplement: NIHMS605554-supplement-supplement_1.pdf [file NIHMS605554-supplement-supplement_1.pdf]

| <b>Online Supplement, Table 1.</b> Exercise capacity of HFpEF patients with and without diabetes |                          |                     |                |
|--------------------------------------------------------------------------------------------------|--------------------------|---------------------|----------------|
|                                                                                                  | <b>Non-DM</b><br>(n=123) | <b>DM</b><br>(n=93) | <b>p-value</b> |
| Exercise modality (treadmill/bike)                                                               | 34%/66%                  | 42%/58%             | 0.22           |
| Peak heart rate                                                                                  | 111 (93,132)             | 106 (89,120)        | 0.08           |
| Chronotropic incompetence                                                                        | 71%                      | 85%                 | 0.02           |
| Chronotropic index                                                                               | 0.55 (0.32,0.71)         | 0.41 (0.27,0.60)    | 0.009          |
| Peak systolic blood pressure                                                                     | 155 (131,168)            | 156 (132,170)       | 0.90           |
| Peak VO <sub>2</sub> (ml/kg/min)                                                                 | 12.3 (10.9,15.0)         | 11.1 (9.6,13.5)     | 0.007          |
| Predicted peak VO <sub>2</sub> , % achieved                                                      | 43.3 (39,51)             | 37.7 (32,45)        | <0.001         |
| Respiratory exchange ratio                                                                       | 1.09 (1.03,1.16)         | 1.08 (1.02,1.15)    | 0.29           |
| Peak VO <sub>2</sub> at VAT – ml/kg/min                                                          | 7.6 (6.4,8.8)            | 6.7 (5.8,8.6)       | 0.02           |
| 6 minute walk distance, m                                                                        | 328 (246,400)            | 297 (187,343)       | <0.001         |
| Predicted 6-minute walk distance, % achieved                                                     | 74 (61,89)               | 62 (44,75)          | <0.001         |

Data reported as median (25<sup>th</sup>, 75<sup>th</sup> percentile) or %.  
Chronotropic index = [peak HR – rest HR] / [(220-age) – rest HR].  
Abbreviations: VO<sub>2</sub>, oxygen consumption; VAT, ventilatory anaerobic threshold; other abbreviations as in Table 1.

| Online Supplement, Table 2. Impact of diabetes on exercise performance. |                                            |             |                                            |             |                                            |             |                                            |             |
|-------------------------------------------------------------------------|--------------------------------------------|-------------|--------------------------------------------|-------------|--------------------------------------------|-------------|--------------------------------------------|-------------|
| Peak VO <sub>2</sub>                                                    |                                            |             |                                            |             |                                            |             |                                            |             |
|                                                                         | Model 1                                    |             | Model 2                                    |             | Model 3                                    |             | Model 4                                    |             |
|                                                                         | $\beta$ -estimate<br>(ml/kg/min)<br>95% CI | p-<br>value |
| Diabetes                                                                | -2.09<br>(-2.82, -1.35)                    | <0.001      | -1.61<br>(-2.36, -0.85)                    | <0.001      | -1.32<br>(-2.06, -0.59)                    | <0.001      | -0.92<br>(-1.61, -0.23)                    | 0.009       |
| Intercept                                                               | 24.96<br>(22.10, 27.81)                    | <0.001      | 29.96<br>(26.10, 33.82)                    | <0.001      | 21.37<br>(16.18, 26.57)                    | <0.001      | 18.2<br>(13.3, 23.1)                       | <0.001      |
| Exercise modality (treadmill*)                                          | 0.47<br>(-0.26, 1.19)                      | 0.21        | 0.65<br>(-0.06, 1.36)                      | 0.07        | 0.49<br>(-0.19, 1.17)                      | 0.15        | 0.50<br>(-0.13, 1.13)                      | 0.12        |
| Age (per year)                                                          | -0.12<br>(-0.15, -0.08)                    | <0.001      | -0.15<br>(-0.18, -0.11)                    | <0.001      | -0.13<br>(-0.17, -0.09)                    | <0.001      | -0.12<br>(-0.15, -0.08)                    | <0.001      |
| Female Sex                                                              | -2.57<br>(-3.30, -1.85)                    | <0.001      | -2.46<br>(-3.16, -1.76)                    | <0.001      | -2.21<br>(-2.89, -1.53)                    | <0.001      | -2.05<br>(-2.68, -1.41)                    | <0.001      |
| Body mass index (kg/m <sup>2</sup> )                                    |                                            |             | -0.10<br>(-0.16, -0.05)                    | <0.001      | -0.10<br>(-0.15, -0.04)                    | <0.001      | -0.09<br>(-0.14, -0.04)                    | <0.001      |
| Hemoglobin (per 1 g/dL)                                                 |                                            |             |                                            |             | 0.53<br>(0.30, 0.75)                       | <0.001      | 0.52<br>(0.31, 0.73)                       | <0.001      |
| Chronotropic index (per 0.1)                                            |                                            |             |                                            |             |                                            |             | 0.33<br>(0.22, 0.44)                       | <0.001      |
| 6 minute walk distance                                                  |                                            |             |                                            |             |                                            |             |                                            |             |
|                                                                         | Model 1                                    |             | Model 2                                    |             | Model 3                                    |             | Model 4                                    |             |
|                                                                         | $\beta$ -estimate<br>(meters)<br>95% CI    | p-<br>value |
| Diabetes                                                                | -75<br>(-105, -45)                         | <0.001      | -51<br>(-81, -21)                          | 0.001       | -44<br>(-75, -14)                          | 0.004       | -38<br>(-69, -7)                           | 0.015       |
| Intercept                                                               | 501<br>(398, 605)                          | <0.001      | 761<br>(612, 909)                          | <0.001      | 567<br>(359, 774)                          | <0.001      | 520<br>(309, 730)                          | <0.001      |
| Age (per year)                                                          | -2<br>(-4, -1)                             | 0.003       | -4<br>(-5, -2)                             | <0.001      | -3<br>(-5, -2)                             | <0.001      | -3.00<br>(-4, -2)                          | <0.001      |
| Female Sex                                                              | -39<br>(-68, -10)                          | 0.01        | -34<br>(-62, -6)                           | 0.02        | -28<br>(-56, 0)                            | 0.051       | -25<br>(-53, 3)                            | 0.08        |
| Body mass index                                                         |                                            |             | -5<br>(-7, -3)                             | <0.001      | -5<br>(-7, -3)                             | <0.001      | -5<br>(-7, -3)                             | <0.001      |

|                                                                                                                                                                                                                                                                               |  |  |  |  |               |      |               |       |
|-------------------------------------------------------------------------------------------------------------------------------------------------------------------------------------------------------------------------------------------------------------------------------|--|--|--|--|---------------|------|---------------|-------|
| (kg/m <sup>2</sup> )                                                                                                                                                                                                                                                          |  |  |  |  |               |      |               |       |
| Hemoglobin<br>(per 1 g/dL)                                                                                                                                                                                                                                                    |  |  |  |  | 12<br>(3, 22) | 0.01 | 12<br>(3, 21) | 0.01  |
| Chronotropic<br>index (per<br>0.1)                                                                                                                                                                                                                                            |  |  |  |  |               |      | 5<br>(0, 10)  | 0.040 |
| <p>*Exercise modality is treadmill vs. bicycle.<br/>           Models 1-4 are linear regression models evaluating the relationship between diabetes and peak VO<sub>2</sub> or 6<br/>           minute walk distance, controlling for a progressive number of covariates.</p> |  |  |  |  |               |      |               |       |
